# Supplementary material
Source: PubMed Central journal article supplement (PMC2292119)
Supplement: NIHMS40938-supplement-01.pdf [file NIHMS40938-supplement-01.pdf]

**Cell Stem Cell, Volume 2**

**Supplemental Data**

**Transparent Adult Zebrafish as a Tool**

**for In Vivo Transplantation Analysis**

**Richard Mark White, Anna Sessa, Christopher Burke, Teresa Bowman, Jocelyn LeBlanc, Craig Ceol Caitlin Bourque Michael Dovey, Wolfram Goessling, Caroline Erter Burns, and Leonard I. Zon**

### Figure S1

Examination of representative organs in wild-type, golden (SLC24A5 mutant), albino (gene unknown), panther (fms mutant), rose (EDNRB mutant) and casper (roy;nacre mutant).

Heart, brain, lateral vessels and intestinal tube can be visualized using standard stereomicroscopy only in the *casper* mutant. These organs are obscured in all other pigment mutants studied.

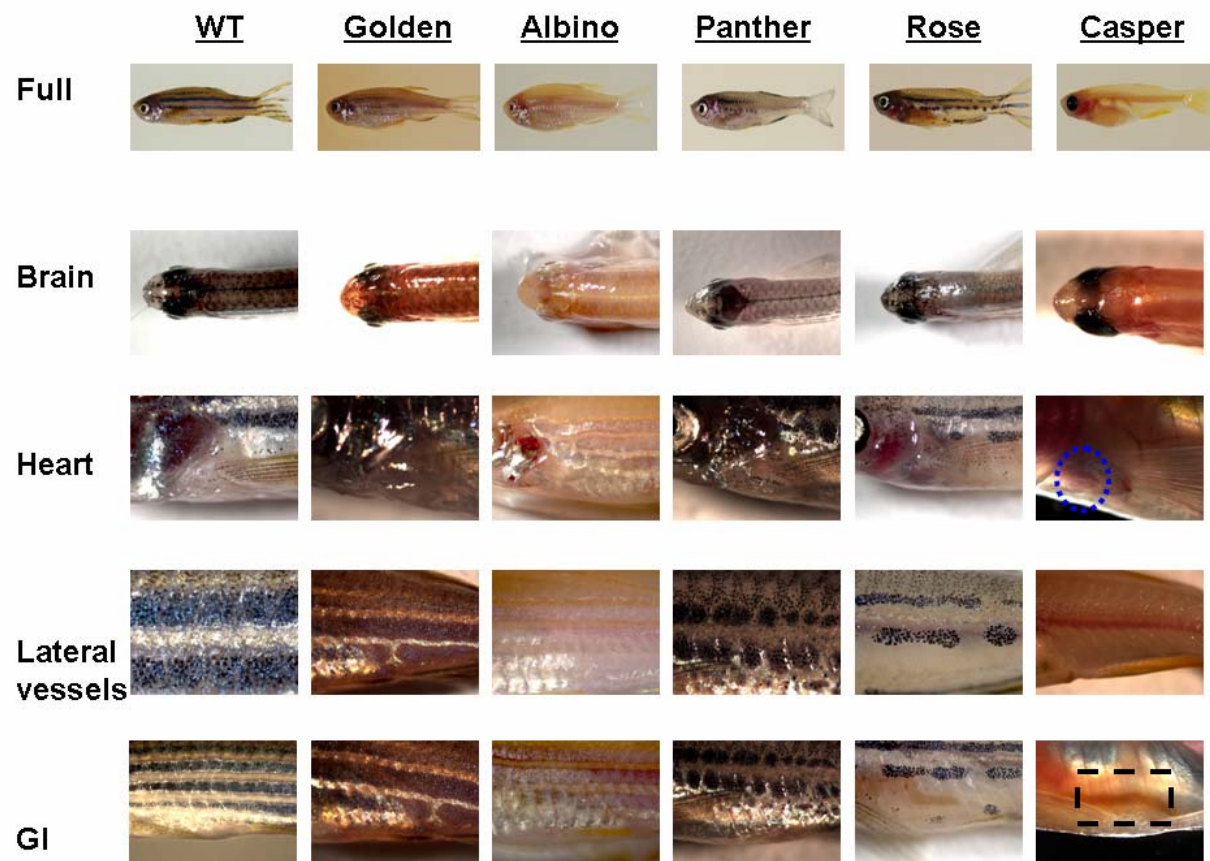

**Figure S2**

Crossing *casper* into the *fli*-GFP transgenic line yields an optically transparent animal in which macro and microvasculature is extensively labeled. Dotted lines indicate region of the aorta visible only in the *casper* line.

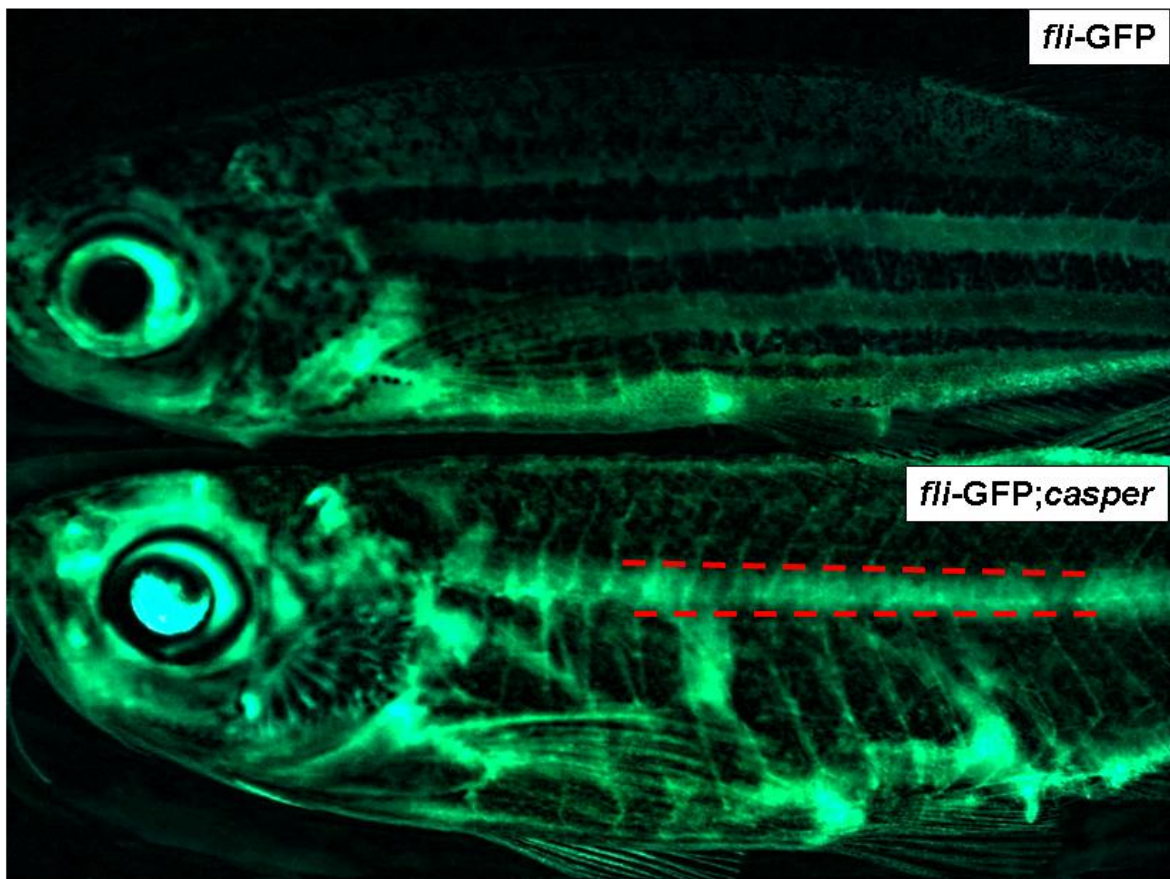

**Table S1**

Comparison of commonly used *in vivo* imaging technologies to the *casper* mutant zebrafish line.

|                               | <b><u>Resolution</u></b> | <b><u>Sensitivity</u></b> | <b><u>Speed of image acquisition</u></b> | <b><u>Special requirements</u></b>                                         | <b><u>References</u></b>                     |
|-------------------------------|--------------------------|---------------------------|------------------------------------------|----------------------------------------------------------------------------|----------------------------------------------|
| microCT                       | 50 um-2mm                | High                      | minutes                                  | Specialized equipment, radiation, IV contrast                              | Paulus, et al, 2000<br>Pickhardt, et al 2005 |
| MRI                           | 25 um                    | Low                       | minutes-hours                            | Specialized equipment, IV contrast                                         | Lee, et al, 2007                             |
| PET                           | 1 mm                     | High                      | minutes                                  | Specialized equipment, radiation, IV isotopes                              | Beckman, et al, 2007<br>Tai, et al, 2005     |
| Bioluminescence               | 1 mm                     | High                      | minutes                                  | IV substrate administration                                                | Cao, et al, 2006<br>Dickson, et al, 2007     |
| Fluorescence(stereo/confocal) | um-mm                    | High                      | Seconds-minutes                          | Confocal/dual photon for deep penetration                                  | Sipkins, et al, 2005                         |
| Ultrasound                    | mm                       | High                      | minutes                                  | Specialized equipment, technical expertise                                 | Goessling, et al, 2007                       |
| <i>Casper</i> fish            | 5um                      | High                      | seconds                                  | Double homozygous line needed; stereomicroscope and/or confocal microscope |                                              |

## Supplemental References

Dickson, P.V., Hamner, B., Ng, C.Y., Hall, M.M., Zhou, J., Hargrove, P.W., McCarville, M.B., and Davidoff, A.M. (2007). In vivo bioluminescence imaging for early detection and monitoring of disease progression in a murine model of neuroblastoma. *J. Pediatr. Surg.* *42*, 1172–1179.

Goessling, W., North, T.E., and Zon, L.I. (2007). Ultrasound biomicroscopy permits in vivo characterization of zebrafish liver tumors. *Nat. Methods* *4*, 551–553.
